# Supplementary material for: The Transient IFN Response and the Delay of Adaptive Immunity Feature the Severity of COVID-19
Source: Front Immunol. 2022 Jan 14;12:816745. doi: 10.3389/fimmu.2021.816745 (PMC8795972; doi:10.3389/fimmu.2021.816745)
Supplement: Supplementary file 5 [file Table_4.xlsx]

## Sheet: Primers used
Tablse S4 List of RT-qPCR primers used in this study.
Gene	Site	Primer
SARS-CoV2(Spike)	Foword	TGCAGGTATATGCGCTAGTTATCAG
	Reverse	CACCAAGTGACATAGTGTAGGCAAT
human IFNB1	Foword	CTTGGATTCCTACAAAGAAGCAGC
	Reverse	TCCTCCTTCTGGAACTGCTGCA
human ISG15	Foword	TCCTGGTGAGGAATAACAAGGG
	Reverse	GTCAGCCAGAACAGGTCGTC
human GAPDH	Foword	GGAGCGAGATCCCTCCAAAAT
	Reverse	GGCTGTTGTCATACTTCTCATG
human ISG56	Foword	TACAGCAACCATGAGTACAA
	Reverse	TCAGGTGTTTCACATAGGC
human OAS3	Foword	GAAGGAGTTCGTAGAGAAGGCG
	Reverse	CCCTTGACAGTTTTCAGCACC
human IL-29	Foword	GGACGCCTTGGAAGAGTCACT
	Reverse	AGAAGCCTCAGGTCCCAATTC
